# Supplementary material for: Features of the potential energy surface for the reaction of OH radical with acetone
Source: Royal Society of Chemistry journal article supplement (doi:10.1039/b210247c), 2003-01-01
Supplement: tables.pdf [file tables.pdf]

**Table S 1:** MP2 structural parameters for reactants, intermolecular complexes, transition states and products for the *hydrogen abstraction reaction* of OH radical with acetone (distances in Å, angles in degrees)

| coordinate                                                  | OH+acetone        |                   | MC1a              |                   | MC1b    | TS1a              |                   | TS1b    | MC4a              |                   | MC4b    | acetyl+H <sub>2</sub> O |                   |
|-------------------------------------------------------------|-------------------|-------------------|-------------------|-------------------|---------|-------------------|-------------------|---------|-------------------|-------------------|---------|-------------------------|-------------------|
|                                                             | 6-31G**/6-31++G** | 6-31G**/6-31++G** | 6-31G**/6-31++G** | 6-31G**/6-31++G** | 6-31G** | 6-31G**/6-31++G** | 6-31G**/6-31++G** | 6-31G** | 6-31G**/6-31++G** | 6-31G**/6-31++G** | 6-31G** | 6-31G**/6-31++G**       | 6-31G**/6-31++G** |
| O <sub>2</sub> H <sub>1</sub>                               |                   |                   | 2.535             | 2.863             |         | 1.240             | 1.266             |         | 0.962             | 0.963             |         | 0.961                   | 0.963             |
| O <sub>1</sub> H <sub>7</sub>                               |                   |                   | 1.933             | 1.923             |         | 2.117             | 2.211             |         | 1.928             | 1.886             |         |                         |                   |
| C <sub>1</sub> O <sub>1</sub>                               | 1.227             | 1.231             | 1.233             | 1.235             | 1.228   | 1.229             | 1.232             | 1.216   | 1.215             | 1.219             | 1.207   | 1.203                   | 1.207             |
| C <sub>1</sub> C <sub>2</sub>                               | 1.513             | 1.512             | 1.508             | 1.501             | 1.512   | 1.507             | 1.507             | 1.514   | 1.469             | 1.470             | 1.474   | 1.476                   | 1.477             |
| C <sub>1</sub> C <sub>3</sub>                               | 1.513             | 1.512             | 1.508             | 1.507             | 1.512   | 1.509             | 1.508             | 1.509   | 1.510             | 1.509             | 1.514   | 1.514                   | 1.513             |
| O <sub>2</sub> H <sub>2</sub>                               |                   |                   |                   |                   | 2.636   |                   |                   | 1.288   | 2.355             | 2.387             | 0.962   |                         |                   |
| C <sub>2</sub> H <sub>1</sub>                               | 1.086             | 1.086             | 1.085             | 1.086             | 1.086   | 1.226             | 1.213             | 1.085   | 3.727             | 4.097             | 1.078   |                         |                   |
| C <sub>2</sub> H <sub>2</sub>                               | 1.090             | 1.091             | 1.090             | 1.095             | 1.089   | 1.089             | 1.089             | 1.205   | 1.079             | 1.079             | 3.859   | 1.079                   | 1.080             |
| C <sub>2</sub> H <sub>3</sub>                               | 1.090             | 1.091             | 1.090             | 1.092             | 1.091   | 1.088             | 1.088             | 1.088   | 1.079             | 1.079             | 1.079   | 1.078                   | 1.079             |
| C <sub>3</sub> H <sub>4</sub>                               | 1.086             | 1.086             | 1.086             | 1.086             | 1.086   | 1.086             | 1.087             | 1.085   | 1.084             | 1.085             | 1.085   | 1.085                   | 1.085             |
| C <sub>3</sub> H <sub>5</sub>                               | 1.090             | 1.091             | 1.090             | 1.092             | 1.090   | 1.090             | 1.090             | 1.089   | 1.090             | 1.091             | 1.088   | 1.090                   | 1.091             |
| C <sub>3</sub> H <sub>6</sub>                               | 1.090             | 1.091             | 1.090             | 1.092             | 1.091   | 1.090             | 1.091             | 1.091   | 1.090             | 1.091             | 1.091   | 1.090                   | 1.091             |
| O <sub>2</sub> H <sub>7</sub>                               | 0.972             |                   | 0.980             | 0.982             | 0.973   | 0.975             | 0.977             | 0.972   | 0.972             | 0.976             | 0.962   | 0.961                   | 0.963             |
| C <sub>2</sub> C <sub>1</sub> O <sub>1</sub>                | 121.8             | 121.7             | 122.2             | 121.9             | 121.9   | 121.8             | 121.5             | 121.0   | 121.7             | 121.6             | 121.7   | 121.4                   | 121.2             |
| C <sub>3</sub> C <sub>1</sub> O <sub>1</sub>                | 121.8             | 121.7             | 120.7             | 120.9             | 122.0   | 121.6             | 121.9             | 123.1   | 121.6             | 121.7             | 122.6   | 122.8                   | 122.7             |
| H <sub>1</sub> C <sub>2</sub> C <sub>1</sub>                | 109.6             | 109.8             | 110.2             | 110.6             | 109.6   | 107.6             | 107.8             | 112.1   | 85.2              | 82.2              | 117.6   |                         |                   |
| H <sub>2</sub> C <sub>2</sub> C <sub>1</sub>                | 110.2             | 110.0             | 109.7             | 110.2             | 109.4   | 111.6             | 111.6             | 105.8   | 118.1             | 118.8             | 102.1   | 122.1                   | 121.8             |
| H <sub>3</sub> C <sub>2</sub> C <sub>1</sub>                | 110.2             | 110.0             | 109.7             | 109.1             | 110.1   | 113.5             | 113.6             | 112.3   | 121.1             | 120.7             | 121.6   | 118.0                   | 118.2             |
| H <sub>4</sub> C <sub>3</sub> C <sub>1</sub>                | 109.6             | 109.8             | 109.8             | 110.0             | 109.6   | 109.6             | 109.8             | 109.5   | 109.4             | 109.5             | 109.2   | 109.2                   | 109.4             |
| H <sub>5</sub> C <sub>3</sub> C <sub>1</sub>                | 110.2             | 110.0             | 110.0             | 109.2             | 109.7   | 110.3             | 110.4             | 109.5   | 109.9             | 109.7             | 111.1   | 109.9                   | 109.7             |
| H <sub>6</sub> C <sub>3</sub> C <sub>1</sub>                | 110.2             | 110.0             | 110.0             | 110.4             | 110.2   | 109.5             | 109.2             | 109.6   | 109.6             | 109.5             | 108.1   | 109.9                   | 109.7             |
| C <sub>1</sub> O <sub>1</sub> H <sub>7</sub>                |                   |                   | 117.1             | 123.3             |         | 100.3             | 100.5             |         | 113.1             | 114.7             |         |                         |                   |
| O <sub>1</sub> H <sub>7</sub> O <sub>2</sub>                |                   |                   | 165.9             | 170.9             |         | 132.1             | 128.4             |         | 160.9             | 159.4             |         |                         |                   |
| H <sub>7</sub> O <sub>2</sub> H <sub>1</sub>                |                   |                   |                   |                   |         |                   |                   |         | 103.6             | 106.1             |         | 103.8                   | 105.3             |
| O <sub>2</sub> H <sub>2</sub> C <sub>2</sub>                |                   |                   |                   |                   | 152.7   |                   |                   | 166.7   |                   |                   | 54.2    |                         |                   |
| H <sub>7</sub> O <sub>2</sub> H <sub>2</sub>                |                   |                   |                   |                   | 92.7    |                   |                   | 99.1    |                   |                   | 104.3   |                         |                   |
| H <sub>1</sub> C <sub>2</sub> C <sub>1</sub> O <sub>1</sub> | 0.0               | 0.0               | 0.1               | -8.0              | -1.0    | 17.7              | 18.8              | -7.6    | -11.7             | 1.0               | 4.0     |                         |                   |
| H <sub>2</sub> C <sub>2</sub> C <sub>1</sub> O <sub>1</sub> | -120.9            | -121.0            | -121.2            | -130.2            | -122.4  | -98.0             | -96.6             | -124.2  | -0.1              | -0.8              | -144.6  | 0.0                     | 0.0               |
| H <sub>3</sub> C <sub>2</sub> C <sub>1</sub> O <sub>1</sub> | 120.9             | 121.0             | 121.4             | 112.4             | 119.8   | 136.2             | 137.0             | 120.1   | 179.5             | 178.3             | -173.2  | 180.0                   | 179.9             |
| H <sub>4</sub> C <sub>3</sub> C <sub>1</sub> O <sub>1</sub> | 0.0               | 0.0               | 0.0               | -8.2              | -0.9    | 4.9               | 7.6               | 2.7     | 0.9               | 0.6               | 16.3    | 0.0                     | 0.0               |
| H <sub>5</sub> C <sub>3</sub> C <sub>1</sub> O <sub>1</sub> | 120.9             | 121.0             | 121.1             | 112.1             | 120.2   | 126.5             | 129.5             | 124.5   | 122.1             | 121.9             | 140.0   | 120.9                   | 121.0             |
| H <sub>6</sub> C <sub>3</sub> C <sub>1</sub> O <sub>1</sub> | -120.9            | -121.0            | -121.1            | -130.2            | -121.9  | -115.5            | -112.6            | -117.9  | -120.0            | -120.3            | -102.3  | -120.9                  | -121.0            |
| C <sub>3</sub> C <sub>1</sub> O <sub>1</sub> C <sub>2</sub> | 180.0             | 180.0             | 180.0             | 180.0             | -179.4  | -179.0            | -179.4            | 179.9   | 180.0             | 179.9             | 178.8   | 180.0                   | 180.0             |
| C <sub>2</sub> C <sub>1</sub> O <sub>1</sub> H <sub>7</sub> |                   |                   | 0.0               | 3.0               |         | -10.1             | -12.4             |         | -4.1              | -6.6              |         |                         |                   |
| C <sub>1</sub> O <sub>1</sub> H <sub>7</sub> O <sub>2</sub> |                   |                   | -0.1              | 6.6               |         | -3.1              | -1.8              |         | 19.2              | -1.3              |         |                         |                   |
| O <sub>2</sub> H <sub>2</sub> C <sub>2</sub> C <sub>1</sub> |                   |                   |                   |                   | -10.5   |                   |                   | -86.9   | 3.2               | 11.5              |         |                         |                   |
| H <sub>7</sub> O <sub>2</sub> H <sub>2</sub> C <sub>2</sub> |                   |                   |                   |                   | 149.7   |                   |                   | -50.7   | 0.8               | -12.9             |         |                         |                   |

**Table S 2:** MP2 structural parameters for intermolecular complexes, transition states and products for the *OH-addition/CH<sub>3</sub>-elimination* pathway of the OH+acetone reaction system (distances in Å, angles in degrees).

| coordinate                                                  | MC 2    | TS 2              |                   | Adduct CH <sub>3</sub> CO(OH)CH <sub>3</sub> |         | TS3     | MC3     | CH <sub>3</sub> COOH + CH <sub>3</sub> |
|-------------------------------------------------------------|---------|-------------------|-------------------|----------------------------------------------|---------|---------|---------|----------------------------------------|
|                                                             | 6-31G** | 6-31G**/6-31++G** | 6-31G**/6-31++G** | 6-31G**/6-31++G**                            | 6-31G** | 6-31G** | 6-31G** |                                        |
| <i>O<sub>2</sub>C<sub>1</sub></i>                           | 3.238   | 1.836             | 1.837             | 1.419                                        | 1.426   | 1.390   | 1.365   | 1.362                                  |
| <i>O<sub>1</sub>H<sub>7</sub></i>                           | 2.012   | 2.133             | 2.160             | 2.413                                        | 2.422   | 2.264   | 2.276   | 2.278                                  |
| <i>C<sub>1</sub>O<sub>1</sub></i>                           | 1.232   | 1.252             | 1.257             | 1.378                                        | 1.379   | 1.244   | 1.217   | 1.217                                  |
| <i>C<sub>1</sub>C<sub>2</sub></i>                           | 1.507   | 1.511             | 1.509             | 1.536                                        | 1.536   | 1.897   | 4.071   |                                        |
| <i>C<sub>1</sub>C<sub>3</sub></i>                           | 1.510   | 1.511             | 1.509             | 1.523                                        | 1.522   | 1.521   | 1.501   | 1.502                                  |
| <i>C<sub>2</sub>H<sub>1</sub></i>                           | 1.086   | 1.086             | 1.086             | 1.089                                        | 1.090   | 1.079   | 1.075   | 1.074                                  |
| <i>C<sub>2</sub>H<sub>2</sub></i>                           | 1.091   | 1.086             | 1.087             | 1.087                                        | 1.088   | 1.081   | 1.075   | 1.074                                  |
| <i>C<sub>2</sub>H<sub>3</sub></i>                           | 1.090   | 1.091             | 1.092             | 1.087                                        | 1.088   | 1.079   | 1.075   | 1.074                                  |
| <i>C<sub>3</sub>H<sub>4</sub></i>                           | 1.087   | 1.085             | 1.085             | 1.087                                        | 1.088   | 1.088   | 1.084   | 1.084                                  |
| <i>C<sub>3</sub>H<sub>5</sub></i>                           | 1.091   | 1.087             | 1.088             | 1.087                                        | 1.088   | 1.086   | 1.088   | 1.088                                  |
| <i>C<sub>3</sub>H<sub>6</sub></i>                           | 1.088   | 1.091             | 1.091             | 1.087                                        | 1.087   | 1.085   | 1.088   | 1.088                                  |
| <i>O<sub>2</sub>H<sub>7</sub></i>                           | 0.977   | 0.975             | 0.977             | 0.966                                        | 0.968   | 0.970   | 0.971   | 0.971                                  |
| <i>O<sub>2</sub>H<sub>1</sub></i>                           |         |                   |                   |                                              |         |         | 2.582   |                                        |
| <i>C<sub>2</sub>C<sub>1</sub>O<sub>1</sub></i>              | 121.4   | 120.0             | 119.8             | 105.0                                        | 105.1   | 96.3    | 131.3   |                                        |
| <i>C<sub>3</sub>C<sub>1</sub>O<sub>1</sub></i>              | 121.1   | 119.9             | 119.8             | 109.8                                        | 109.8   | 122.2   | 126.6   | 126.4                                  |
| <i>H<sub>1</sub>C<sub>2</sub>C<sub>1</sub></i>              | 109.9   | 109.4             | 109.7             | 110.0                                        | 110.1   | 103.1   | 33.2    |                                        |
| <i>H<sub>2</sub>C<sub>2</sub>C<sub>1</sub></i>              | 109.5   | 111.5             | 111.5             | 108.0                                        | 107.7   | 99.9    | 129.1   |                                        |
| <i>H<sub>3</sub>C<sub>2</sub>C<sub>1</sub></i>              | 110.2   | 107.7             | 107.2             | 111.0                                        | 110.8   | 105.5   | 103.7   |                                        |
| <i>H<sub>4</sub>C<sub>3</sub>C<sub>1</sub></i>              | 109.5   | 109.0             | 109.3             | 109.2                                        | 109.3   | 106.5   | 109.3   | 109.3                                  |
| <i>H<sub>5</sub>C<sub>3</sub>C<sub>1</sub></i>              | 107.7   | 111.5             | 111.4             | 109.1                                        | 108.9   | 111.7   | 109.7   | 109.6                                  |
| <i>H<sub>6</sub>C<sub>3</sub>C<sub>1</sub></i>              | 112.2   | 107.5             | 107.2             | 110.1                                        | 110.0   | 109.8   | 109.3   | 109.6                                  |
| <i>C<sub>1</sub>O<sub>1</sub>H<sub>7</sub></i>              | 104.3   | 79.3              | 79.8              | 53.1                                         | 53.5    | 56.1    | 55.3    | 55.1                                   |
| <i>O<sub>1</sub>H<sub>7</sub>O<sub>2</sub></i>              | 147.7   | 79.7              | 78.2              | 73.3                                         | 72.9    | 78.8    | 77.0    | 76.9                                   |
| <i>H<sub>1</sub>C<sub>2</sub>C<sub>1</sub>O<sub>1</sub></i> | - 1.9   | -31.1             | -32.2             | -58.6                                        | -58.7   | -57.9   | -106.4  |                                        |
| <i>H<sub>2</sub>C<sub>2</sub>C<sub>1</sub>O<sub>1</sub></i> | - 122.8 | -153.8            | -155.1            | -177.2                                       | -177.3  | -176.7  | 167.1   |                                        |
| <i>H<sub>3</sub>C<sub>2</sub>C<sub>1</sub>O<sub>1</sub></i> | 119.5   | 86.9              | 85.8              | 62.1                                         | 62.2    | 62.6    | 18.4    |                                        |
| <i>H<sub>4</sub>C<sub>3</sub>C<sub>1</sub>O<sub>1</sub></i> | - 32.2  | 30.9              | 30.6              | 60.6                                         | 59.2    | 74.6    | 3.1     | 0.1                                    |
| <i>H<sub>5</sub>C<sub>3</sub>C<sub>1</sub>O<sub>1</sub></i> | 85.1    | 153.3             | 153.2             | 179.4                                        | 178.0   | - 166.8 | 124.3   | 121.0                                  |
| <i>H<sub>6</sub>C<sub>3</sub>C<sub>1</sub>O<sub>1</sub></i> | - 155.0 | -87.6             | -88.0             | -59.9                                        | -61.3   | - 43.4  | -117.6  | -120.9                                 |
| <i>C<sub>3</sub>C<sub>1</sub>O<sub>1</sub>C<sub>2</sub></i> | - 177.3 | 157.5             | 157.3             | 121.5                                        | 121.8   | 107.6   | 101.5   |                                        |
| <i>C<sub>2</sub>C<sub>1</sub>O<sub>1</sub>H<sub>7</sub></i> | 124.7   | 88.1              | 89.5              | 99.9                                         | 100.5   | 102.5   | 77.9    |                                        |
| <i>C<sub>1</sub>O<sub>1</sub>H<sub>7</sub>O<sub>2</sub></i> | - 29.1  | 29.9              | 28.1              | 30.1                                         | 29.3    | 6.9     | 0.2     | 0.0                                    |
| <i>O<sub>2</sub>C<sub>1</sub>C<sub>2</sub>C<sub>3</sub></i> | - 99.5  | - 107.0           | - 107.3           |                                              |         |         |         |                                        |



**Table S 4:** Harmonic vibrational frequencies (in  $\text{cm}^{-1}$ ) for the intermolecular complexes found on the PES of the OH + acetone reaction system. In brackets the IR line intensities are given (in  $\text{km mol}^{-1}$ ). Both have been calculated at the MP2/6-31G\*\* level of theory and the frequencies are scaled by 0.95.

|    | <b>MC1a</b> | <b>MC1b</b> | <b>MC2</b>  | <b>MC3</b>  | <b>MC4a</b>  | <b>MC4b</b> | <b>MC5a</b> | <b>MC5b</b> | <b>MC6a</b> |
|----|-------------|-------------|-------------|-------------|--------------|-------------|-------------|-------------|-------------|
| 1  | 36(0.1)     | 14(13.2)    | 11(4.1)     | 18(1.0)     | 55(2.9)      | 29(4.9)     | 9(0.0)      | 9(6.4)      | 25(0.6)     |
| 2  | 45(0.0)     | 51(11.4)    | 75(1.8)     | 55(1.1)     | 93(0.3)      | 65(187.8)   | 36(1.5)     | 38(22.4)    | 55(1.8)     |
| 3  | 78(6.7)     | 70(116.3)   | 104(7.5)    | 67(0.0)     | 130(17.7)    | 75(25.8)    | 36(8.0)     | 47(19.4)    | 63(0.3)     |
| 4  | 128(1.0)    | 91(10.2)    | 141(0.7)    | 83(0.1)     | 166(7.9)     | 97(49.9)    | 45(68.7)    | 56(2.5)     | 89(0.8)     |
| 5  | 167(4.6)    | 99(70.2)    | 161(5.3)    | 104(0.2)    | 181(101.7)   | 104(5.6)    | 59(0.6)     | 60(32.2)    | 102(0.5)    |
| 6  | 374(3.9)    | 119(80.0)   | 365(5.9)    | 113(0.3)    | 309(28.3)    | 118(77.4)   | 68(10.1)    | 85(15.2)    | 127(0.0)    |
| 7  | 465(0.8)    | 167(8.4)    | 381(108.3)  | 209(2.8)    | 352(70.0)    | 152(21.6)   | 96(20.8)    | 108(4.0)    | 232(3.2)    |
| 8  | 523(93.6)   | 366(2.5)    | 464(24.0)   | 405(3.5)    | 384(8.2)     | 308(1.1)    | 116(13.1)   | 127(29.5)   | 408(7.5)    |
| 9  | 531(118.3)  | 468(0.3)    | 509(111.2)  | 445(76.6)   | 520(3.2)     | 382(6.3)    | 137(0.1)    | 139(34.0)   | 472(87.4)   |
| 10 | 534(136.1)  | 508(14.8)   | 517(173.9)  | 526(21.0)   | 529(19.1)    | 505(12.6)   | 161(0.1)    | 142(271.7)  | 526(17.2)   |
| 11 | 782(0.4)    | 775(1.1)    | 776(0.7)    | 553(45.5)   | 665(238.8)   | 516(5.1)    | 258(363.2)  | 201(8.6)    | 557(45.3)   |
| 12 | 873(0.1)    | 874(1.0)    | 867(1.1)    | 653(118.9)  | 681(63.3)    | 651(41.7)   | 292(0.1)    | 279(31.1)   | 656(118.6)  |
| 13 | 888(2.7)    | 884(3.3)    | 909(3.7)    | 839(5.3)    | 805(0.1)     | 792(1.4)    | 400(2.2)    | 425(1.7)    | 843(2.7)    |
| 14 | 1062(0.1)   | 1060(0.4)   | 1056(0.3)   | 979(69.5)   | 897(10.5)    | 895(14.5)   | 421(87.4)   | 446(105.2)  | 984(65.3)   |
| 15 | 1093(2.5)   | 1095(4.6)   | 1089(4.6)   | 1044(7.6)   | 1012(9.4)    | 1013(11.2)  | 505(81.1)   | 507(46.7)   | 1044(5.5)   |
| 16 | 1233(53.9)  | 1218(56.5)  | 1226(63.0)  | 1167(191.7) | 1059(11.0)   | 1058(5.6)   | 567(59.1)   | 612(71.9)   | 1172(205.5) |
| 17 | 1370(17.6)  | 1363(10.2)  | 1364(10.5)  | 1304(43.9)  | 1254(91.6)   | 1230(100.3) | 956(18.2)   | 974(7.6)    | 1314(54.0)  |
| 18 | 1377(53.6)  | 1371(63.4)  | 1372(63.9)  | 1389(60.5)  | 1369(45.0)   | 1369(41.0)  | 1107(6.3)   | 1115(2.9)   | 1392(62.9)  |
| 19 | 1446(3.3)   | 1448(0.1)   | 1445(16.7)  | 1414(1.0)   | 1439(33.1)   | 1438(27.8)  | 1366(15.5)  | 1393(13.7)  | 1414(1.2)   |
| 20 | 1447(0.0)   | 1454(2.6)   | 1448(8.7)   | 1423(0.6)   | 1448(8.2)    | 1454(13.8)  | 1413(2.5)   | 1415(1.3)   | 1429(0.5)   |
| 21 | 1454(23.6)  | 1456(19.7)  | 1454(5.0)   | 1458(10.2)  | 1456(8.9)    | 1461(8.7)   | 1416(1.1)   | 1428(1.3)   | 1456(10.2)  |
| 22 | 1468(19.8)  | 1472(12.1)  | 1468(13.3)  | 1460(6.7)   | 1636(67.3)   | 1590(69.8)  | 1598(54.4)  | 1588(66.4)  | 1463(6.9)   |
| 23 | 1691(116.8) | 1705(93.7)  | 1693(106.8) | 1766(235.6) | 1970(1133.3) | 1991(854.9) | 2120(385.6) | 2124(394.3) | 1756(265.8) |
| 24 | 2973(0.3)   | 2973(3.0)   | 2973(1.2)   | 2995(1.4)   | 2979(0.2)    | 2979(2.8)   | 3075(0.0)   | 3069(3.2)   | 2995(2.3)   |
| 25 | 2978(3.7)   | 2977(4.5)   | 2979(2.3)   | 3072(2.2)   | 3065(4.3)    | 3070(4.6)   | 3132(28.2)  | 3111(72.2)  | 3067(7.6)   |
| 26 | 3055(0.2)   | 3058(1.9)   | 3055(4.9)   | 3083(1.6)   | 3092(15.8)   | 3098(5.2)   | 3248(12.1)  | 3225(32.8)  | 3082(3.0)   |
| 27 | 3061(9.8)   | 3064(8.7)   | 3072(4.3)   | 3120(3.2)   | 3117(5.5)    | 3113(4.5)   | 3261(4.1)   | 3254(5.9)   | 3122(0.7)   |
| 28 | 3105(4.8)   | 3100(9.2)   | 3096(7.9)   | 3258(5.0)   | 3225(3.9)    | 3230(0.7)   | 3263(2.7)   | 3261(0.5)   | 3253(7.0)   |
| 29 | 3110(3.1)   | 3101(4.7)   | 3104(6.0)   | 3264(0.3)   | 3564(259.0)  | 3690(13.1)  | 3686(10.6)  | 3684(13.0)  | 3259(0.8)   |
| 30 | 3510(280.5) | 3641(15.0)  | 3572(110.5) | 3621(62.9)  | 3777(69.7)   | 3820(50.5)  | 3811(44.9)  | 3815(49.4)  | 3624(64.0)  |
